# Supplementary material
Source: PubMed Central journal article supplement (PMC6988868)
Supplement: fj.201802072R.sd1.pdf [file fj.201802072R.sd1.pdf]

# Liu et al. Supplementary Figure 1

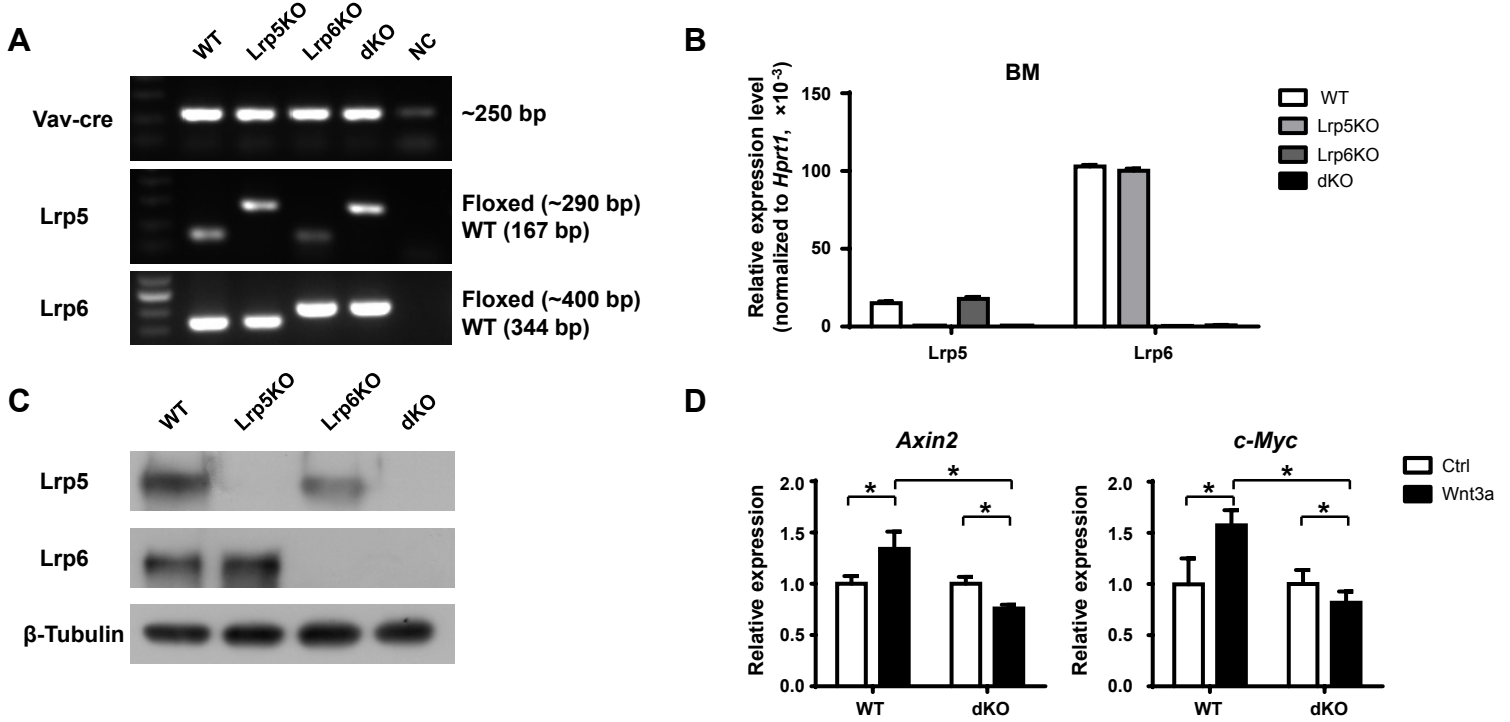

**Figure S1. Characterization of Lrp5 and Lrp6 knockout mice.**

(A) Genotyping of the wild-type (*Vav-Cre*), Lrp5KO (*Lrp5<sup>fl/fl</sup>Lrp6<sup>+/+</sup>Vav-Cre*), Lrp6KO (*Lrp5<sup>+/+</sup>Lrp6<sup>fl/fl</sup>Vav-Cre*) and dKO (*Lrp5<sup>fl/fl</sup>Lrp6<sup>fl/fl</sup>Vav-Cre*) mice with genomic DNA. The product size of *Vav-Cre* was appropriately 250 bp. The product sizes of Lrp5 were 167 bp from WT allele and 290 bp from floxed allele, respectively. The product sizes of Lrp6 were 344 bp from WT allele and about 400 bp from floxed allele, respectively. (B) Quantitative RT-PCR analysis of Lrp5 and Lrp6 expression in BM cells from wild-type, Lrp5KO, Lrp6KO and dKO mice. Relative gene expression levels were normalized to *Hprt1*. (C) Western blotting analysis of Lrp5 and Lrp6 expression in BM cells from wild-type, Lrp5KO, Lrp6KO and dKO mice.  $\beta$ -tubulin were set as an internal control. (D) Analysis of the canonical Wnt pathway activation. Lin<sup>+</sup> BM cells were treated with rmWnt3a (40 ng/ml) and Wnt target genes *Axin2* and *c-Myc* were detected by quantitative RT-PCR. Relative gene expression levels were normalized to *Hprt1*. Data are representative of at least two independent experiments (means  $\pm$  S.D.). (n  $\geq$  4).

\**p* < 0.05, by Student's *t* test.

## Liu et al. Supplementary Figure 2

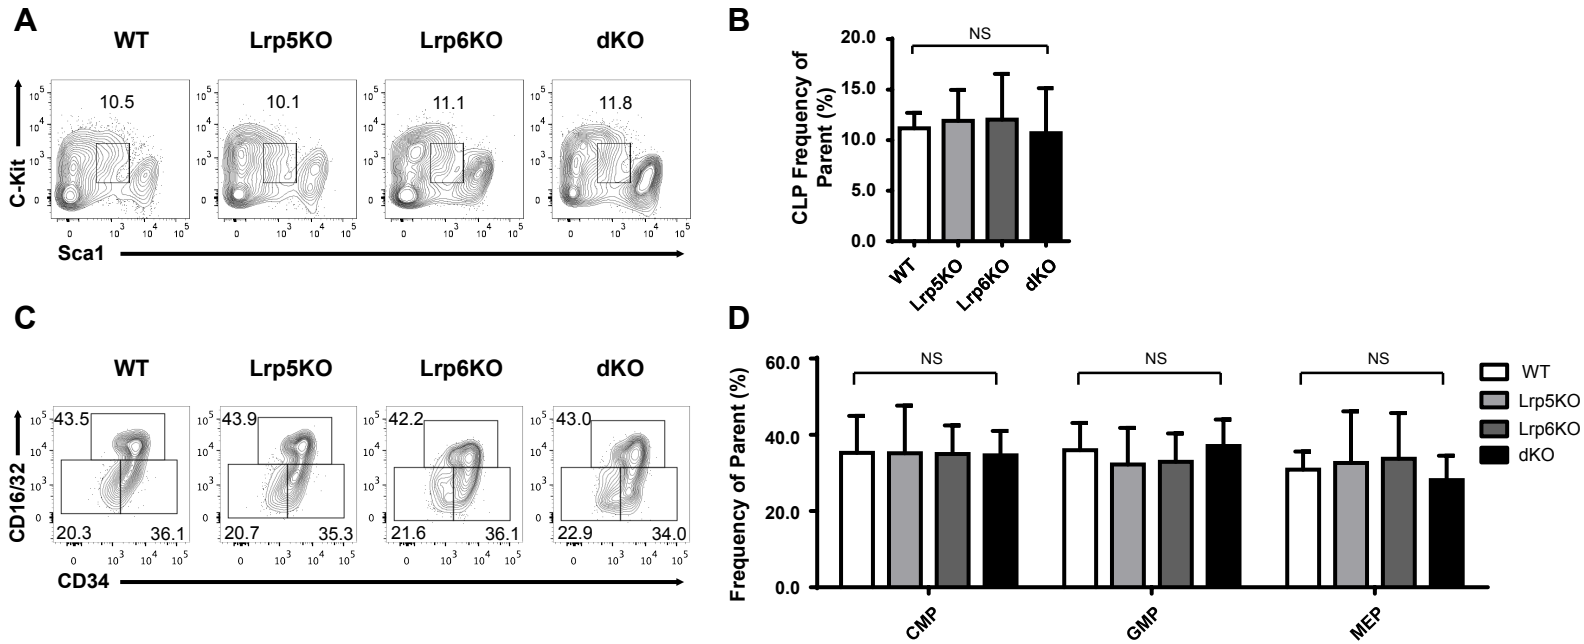

### Figure S2. Characterization of progenitor cells in *Lrp5* and *Lrp6* KO mice.

(A-B) Flow cytometry analysis of CLP ( $\text{Lin}^{-}\text{CD127}^{+}\text{Sca-1}^{\text{med}}\text{c-kit}^{\text{med}}$ ). The percentages of CLP are shown in representative contour plots (A). Cumulative data of CLP are shown in (B). (C-D) Flow cytometry analysis of CMP, GMP, and MEP. BMs were surface stained by CD34 and CD16/32 to identify CMP ( $\text{CD34}^{+}\text{CD16/32}^{\text{lo}}$ ), GMP ( $\text{CD34}^{+}\text{CD16/32}^{\text{hi}}$ ) and MEP ( $\text{CD34}^{-}\text{CD16/32}^{\text{lo}}$ ). The percentages of each cell subsets are shown in representative contour plots (C). Cumulative data of CMP, GMP and MEP are shown in (D). Data are representative of four independent experiments (means  $\pm$  S.D.) ( $n \geq 6$ ) NS, not significant, by Student's *t* test.

# Liu et al. Supplementary Figure 3

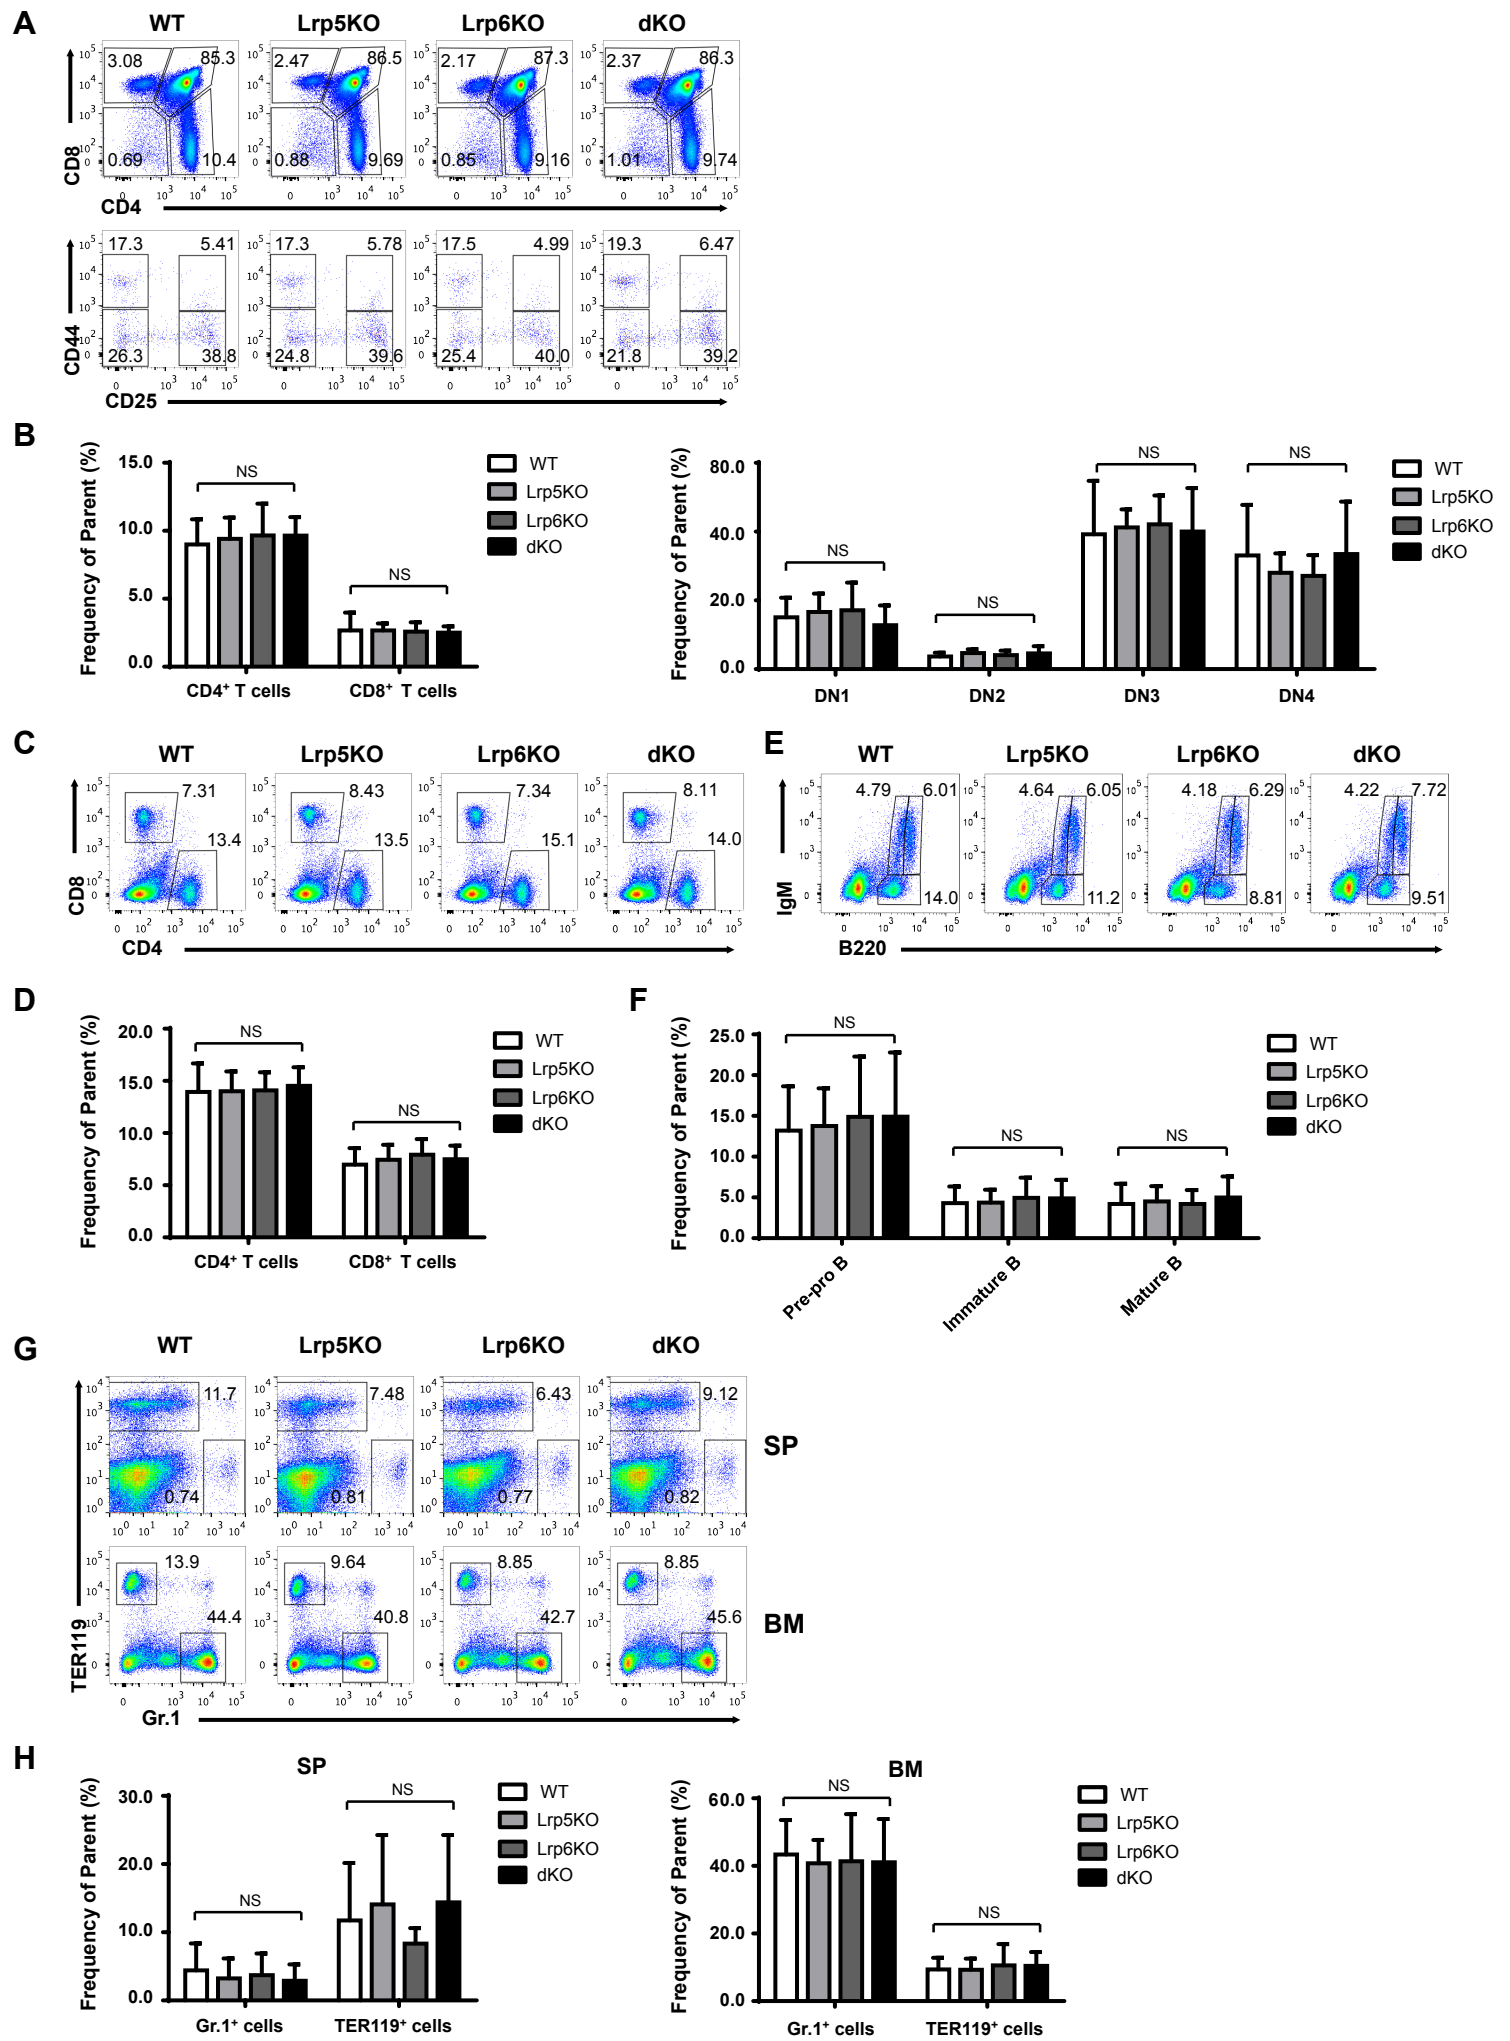

**Figure S3. Detection of the lymphoid and myeloid cells in Lrp5 and Lrp6 KO mice.**

**(A-B)** Flow cytometry analysis of T cell development. Thymocytes from indicated mice were surface stained with CD4, CD8, CD44, and CD25. The percentages of each cell subsets were shown in representative pseudocolor plots **(A)**. Cumulative data of CD4<sup>+</sup> single positive T cells, CD8<sup>+</sup> single positive T cells and DN1 (lin<sup>-</sup>CD4<sup>-</sup>CD8<sup>-</sup>CD44<sup>+</sup>CD25<sup>-</sup> thymocytes), DN2 (lin<sup>-</sup>CD4<sup>-</sup>CD8<sup>-</sup>CD44<sup>+</sup>CD25<sup>+</sup> thymocytes), DN3 (lin<sup>-</sup>CD4<sup>-</sup>CD8<sup>-</sup>CD44<sup>-</sup>CD25<sup>+</sup> thymocytes), and DN4 (lin<sup>-</sup>CD4<sup>-</sup>CD8<sup>-</sup>CD44<sup>-</sup>CD25<sup>-</sup> thymocytes) cells are shown in **(B)** (n ≥ 12). **(C-D)** Flow cytometry analysis of splenic T cells. Splenocytes were surface stained with CD4 and CD8. The percentages of indicated cell subsets are shown in representative pseudocolor plots **(C)**. Cumulative data of indicated cells are shown in **(D)** (n ≥ 12). **(E-F)** Flow cytometry analysis of B cell development. BM cells were surface stained with B220 and IgM. The percentages of indicated cell subsets are shown in representative pseudocolor plots **(E)**. Cumulative data of indicated cells are shown in **(F)** (n ≥ 14). **(G-H)** Flow cytometry analysis of Gr.1<sup>+</sup> and Ter119<sup>+</sup> cell populations in spleen and BM cells. Splenocytes and BM cells were surface stained with Gr.1 and Ter119. The percentages of Gr.1<sup>+</sup> and Ter119<sup>+</sup> cells are shown in representative pseudocolor plots **(G)**. Cumulative data of Gr.1<sup>+</sup> and Ter119<sup>+</sup> cells are shown in **(H)**. Data are representative of four **(G-H)**, five **(A-D)** or six **(E-F)** independent experiments (means ± S.D.) (n ≥ 8). NS, not significant, by Student's *t* test.

## Liu et al. Supplementary Tables

### Table 1 Primers for genotyping

| Primer      | Sequence (5'→3')          |
|-------------|---------------------------|
| Lrp5-Type-F | TCACCTGTCCTAGTGCAGAAGGA   |
| Lrp5-Type-R | CCACCAATCATCAGCCAAGGA     |
| Lrp6-Type-F | CCGTCTGTTTGCATAAAGCAACA   |
| Lrp6-Type-R | GGGGTTCTACTTTTGTGTGTGG    |
| Vav1-cre-F  | AGATGCCAGGACATCAGGAACCTG  |
| Vav1-cre-R  | ATCAGCCACACCAGACACAGAGATC |

### Table 2 Primers for quantitative RT-PCR

| Primer      | Sequence (5'→3')              |
|-------------|-------------------------------|
| RT-Axin2-F  | AAGAGAAGCGACCCAGTCAA          |
| RT-Axin2-R  | CTGCGATGCATCTCTCTCTG          |
| RT-Btg2-F   | ATGAGCCACGGGAAGAGAAC          |
| RT-Btg2-R   | GCCCTACTGAAAACCTTGAGTC        |
| RT-Ccna2-F  | CAGCATGAGGGCCATCCTT           |
| RT-Ccna2-R  | GCAGGGTCTCATTCTGTAGTTTATATTCT |
| RT-Cdkn1a-F | GCAGATCCACAGCGATATCCAG        |
| RT-Cdkn1a-R | GAGGAAGTACTGGGCCTCTTGT        |
| RT-c-Myc-F  | GTACCTCGTCCGATTCCACG          |
| RT-c-Myc-R  | GCCTCTTCTCCACAGACACC          |
| RT-Egr1-F   | GAGCGAACAACCCTATGAGC          |

|             |                         |
|-------------|-------------------------|
| RT-Egr1-R   | GAGTCGTTTGGCTGGGATAA    |
| RT-GAPDH-F  | CTTCAACAGCAACTCCCCTC    |
| RT-GAPDH-R  | CCTGTTGCTGTAGCCGTATTC   |
| RT-Gata2-F  | GCTTCACCCCTAAGCAGAGA    |
| RT-Gata2-R  | TGGCACCCACAGTTGACACA    |
| RT-Hprt1-F  | GCGTCGTGATTAGCGATGATG   |
| RT-Hprt1-R  | CTCGAGCAAGTCTTTCAGTCC   |
| RT-Junb-F   | TCACGACGACTCTTACGCAG    |
| RT-Junb-R   | CCTTGAGACCCCGATAGGGA    |
| RT-Lef1-F   | TGAGTGCACGCTAAAGGAGA    |
| RT-Lef1-R   | CTGACCAGCCTGGATAAAGC    |
| RT-LRP5-F   | GGACGTCCCGTAAGGTTCTC    |
| RT-LRP5-R   | CCATTGGGCCAGTAAATGTC    |
| RT-LRP6- F  | GAGTTGGATCAACCCAGAGC    |
| RT-LRP6- R  | GTCAGTCCGTTTGGCCAGTA    |
| RT-Nr4a1-F  | TTGAGTTCGGCAAGCCTACC    |
| RT-Nr4a1-R  | GTGTACCCGTCCATGAAGGTG   |
| RT-Ranbp1-F | CGAGGACCATGATACTTCCACA  |
| RT-Ranbp1-R | CCTCCAGCGTTTTAATTTCTTGC |
| RT-Ran-F    | CCACTTGACGGGCGAGTTT     |
| RT-Ran-R    | CCACACAATACAATGGGGATGTT |

---
